# Supplementary material for: Empirical Model of a High-Temperature Proton Exchange Membrane Fuel Cell for Diagnostics Based on Test Without Active Gases Procedure
Source: Research Square preprint supplement (doi:10.21203/rs.3.rs-7308557/v1), 2025-08-22
Supplement: Supplementary file 1 [file 18d072df784caa304630761d.xlsx]

## Sheet: T40C
Time_s	Measured_mV	Simulated_mV
0	0.009	0.496378
1.9	1	1.08825
2.9	1	1.39769
3.9	1.9	1.70571
4.9	1	2.01232
5.9	1.4	2.31752
6.9	1.9	2.62132
7.9	2.8	2.92372
8.9	2.8	3.22473
9.9	3.2	3.52437
10.9	3.7	3.82263
11.9	3.7	4.11951
12.9	4.1	4.41504
13.9	3.7	4.70921
14.9	6	5.00203
15.9	5.1	5.2935
16.9	5.1	5.58364
17.9	6	5.87245
18.9	6	6.15993
19.9	5.5	6.44609
20.9	6	6.73093
21.9	6	7.01447
22.9	6.9	7.29671
23.9	6.9	7.57765
24.9	6.9	7.8573
25.9	7.3	8.13567
26.9	7.3	8.41276
27.9	8.3	8.68858
28.9	7.8	8.96313
29.9	8.3	9.23643
30.9	8.3	9.50846
31.9	9.6	9.77925
32.9	9.2	10.0488
33.9	9.2	10.3171
34.9	9.2	10.5842
35.9	9.2	10.85
36.9	10.1	11.1147
37.9	10.5	11.3781
38.9	11	11.6403
39.9	11	11.9013
40.9	11	12.1611
41.9	11	12.4197
42.9	11.9	12.6771
43.9	12.4	12.9334
44.9	12.4	13.1885
45.9	11.9	13.4423
46.9	12.4	13.6951
47.9	12.8	13.9467
48.9	13.7	14.1971
49.9	13.3	14.4463
50.9	12.4	14.6945
51.9	14.2	14.9414
52.9	14.2	15.1873
53.9	15.1	15.432
54.9	14.7	15.6756
55.9	14.7	15.9181
56.9	14.7	16.1595
57.9	15.6	16.3997
58.9	15.1	16.6389
59.9	15.1	16.8769
60.9	16	17.1139
61.9	15.1	17.3498
62.9	16	17.5846
63.9	16.5	17.8183
64.9	16.5	18.0509
65.9	16.9	18.2825
66.9	17.4	18.513
67.9	17.4	18.7425
68.9	17.4	18.9709
69.9	17.8	19.1982
70.9	17.8	19.4245
71.9	18.3	19.6498
72.9	19.2	19.8741
73.9	18.8	20.0973
74.9	19.7	20.3194
75.9	19.2	20.5406
76.9	20.1	20.7608
77.9	19.2	20.9799
78.9	20.1	21.198
79.9	20.1	21.4152
80.9	20.1	21.6313
81.9	20.6	21.8464
82.9	21	22.0606
83.9	21	22.2738
84.9	21.5	22.486
85.9	22	22.6972
86.9	21	22.9074
87.9	22.9	23.1167
88.9	22	23.325
89.9	22.4	23.5324
90.9	22	23.7388
91.9	22.4	23.9443
92.9	23.8	24.1488
93.9	22.9	24.3524
94.9	22.9	24.555
95.9	22.9	24.7568
96.9	24.2	24.9576
97.9	23.3	25.1574
98.9	23.8	25.3564
99.9	24.7	25.5544
100.9	24.61	25.7516
101.9	24.25	25.9478
102.9	24.7	26.1431
103.9	25.51	26.3375
104.9	25.15	26.5311
105.9	25.56	26.7237
106.9	25.51	26.9155
107.9	26.05	27.1064
108.9	25.65	27.2964
109.9	26.46	27.4855
110.9	26.1	27.6738
111.9	26.1	27.8612
112.9	26.14	28.0477
113.9	26.14	28.2334
114.9	27.4	28.4183
115.9	27.36	28.6023
116.9	27.14	28.7854
117.9	27.5	28.9677
118.9	27.9	29.1492
119.9	27.9	29.3298
120.9	28.35	29.5096
121.9	27.85	29.6886
122.9	27.95	29.8667
123.9	28.44	30.0441
124.9	29.21	30.2206
125.9	29.3	30.3963
126.9	28.49	30.5712
127.9	28.8	30.7453
128.9	28.8	30.9186
129.9	29.34	31.0911
130.9	29.61	31.2629
131.9	30.15	31.4338
132.9	30.24	31.6039
133.9	30.6	31.7733
134.9	30.65	31.9419
135.9	31.91	32.1097
136.9	30.69	32.2767
137.9	31.01	32.443
138.9	31.46	32.6085
139.9	31.41	32.7733
140.9	30.65	32.9373
141.9	31.91	33.1005
142.9	31.24	33.263
143.9	31.5	33.4248
144.9	31.24	33.5858
145.9	32.81	33.746
146.9	32.45	33.9056
147.9	32.9	34.0644
148.9	33.35	34.2224
149.9	33.4	34.3798
150.9	33.4	34.5364
151.9	32.95	34.6923
152.9	33.71	34.8475
153.9	33.44	35.002
154.9	33.44	35.1557
155.9	33.44	35.3088
156.9	33.8	35.4612
157.9	34.61	35.6128
158.9	34.66	35.7638
159.9	35.15	35.9141
160.9	34.66	36.0636
161.9	34.7	36.2125
162.9	34.8	36.3607
163.9	35.65	36.5083
164.9	35.7	36.6551
165.9	35.65	36.8013
166.9	36.01	36.9468
167.9	36.46	37.0916
168.9	35.25	37.2358
169.9	35.74	37.3793
170.9	36.1	37.5222
171.9	36.1	37.6644
172.9	36.91	37.8059
173.9	36.96	37.9468
174.9	36.64	38.0871
175.9	36.55	38.2267
176.9	37	38.3656
177.9	36.6	38.504
178.9	37	38.6416
179.9	37.81	38.7787
180.9	37.86	38.9151
181.9	37.5	39.0509
182.9	37.86	39.1861
183.9	37.05	39.3207
184.9	37.54	39.4546
185.9	37.95	39.5879
186.9	39.16	39.7207
187.9	37.9	39.8528
188.9	37.95	39.9843
189.9	39.21	40.1152
190.9	39.3	40.2455
191.9	38.94	40.3752
192.9	39.3	40.5043
193.9	39.71	40.6328
194.9	39.03	40.7607
195.9	39.8	40.888
196.9	40.56	41.0148
197.9	39.89	41.1409
198.9	40.2	41.2665
199.9	40.2	41.3915
200.9	40.25	41.516
201.9	40.65	41.6398
202.9	40.29	41.7631
203.9	40.7	41.8859
204.9	41.55	42.008
205.9	40.79	42.1296
206.9	41.15	42.2507
207.9	40.79	42.3712
208.9	41.06	42.4911
209.9	41.91	42.6105
210.9	42.05	42.7293
211.9	42.55	42.8476
212.9	42.05	42.9654
213.9	42	43.0826
214.9	42.5	43.1993
215.9	42.05	43.3154
216.9	43.04	43.431
217.9	42.5	43.5461
218.9	42.55	43.6606
219.9	42.5	43.7747
220.9	43.9	43.8882
221.9	43.04	44.0011
222.9	43.4	44.1136
223.9	43.81	44.2255
224.9	43.09	44.337
225.9	43.49	44.4479
226.9	43.9	44.5583
227.9	44.21	44.6682
228.9	43.85	44.7776
229.9	43.9	44.8865
230.9	44.26	44.9949
231.9	44.3	45.1028
232.9	44.3	45.2102
233.9	45.16	45.3171
234.9	44.89	45.4235
235.9	44.84	45.5294
236.9	45.25	45.6349
237.9	45.56	45.7398
238.9	45.25	45.8443
239.9	45.11	45.9483
240.9	44.89	46.0518
241.9	45.75	46.1548
242.9	46.2	46.2574
243.9	45.75	46.3595
244.9	45.75	46.4611
245.9	45.79	46.5623
246.9	46.51	46.663
247.9	46.24	46.7633
248.9	46.51	46.863
249.9	46.6	46.9624
250.9	46.56	47.0612
251.9	46.69	47.1596
252.9	47.1	47.2576
253.9	46.74	47.3551
254.9	47.14	47.4522
255.9	47.95	47.5488
256.9	47.14	47.6449
257.9	47.14	47.7407
258.9	47.95	47.836
259.9	46.74	47.9308
260.9	47.95	48.0252
261.9	47.95	48.1192
262.9	48.4	48.2128
263.9	48.4	48.3059
264.9	48.4	48.3986
265.9	48.36	48.4909
266.9	49.3	48.5827
267.9	48.45	48.6741
268.9	49.71	48.7652
269.9	49.4	48.8557
270.9	49.4	48.9459
271.9	48.45	49.0357
272.9	48.5	49.125
273.9	48.95	49.214
274.9	49.44	49.3025
275.9	49.85	49.3906
276.9	49.49	49.4783
277.9	49.44	49.5656
278.9	50.3	49.6526
279.9	50.57	49.7391
280.9	51.2	49.8252
281.9	50.25	49.9109
282.9	50.3	49.9962
283.9	51.06	50.0812
284.9	51.56	50.1657
285.9	50.75	50.2499
286.9	51.47	50.3337
287.9	50.75	50.4171
288.9	51.56	50.5001
289.9	51.6	50.5827
290.9	51.65	50.6649
291.9	51.6	50.7468
292.9	52.46	50.8283
293.9	52.01	50.9094
294.9	52.15	50.9902
295.9	52.46	51.0705
296.9	52.1	51.1505
297.9	51.6	51.2302
298.9	52.1	51.3095
299.9	52.55	51.3884
300.9	51.648	50.6895
301.9	51.6297	50.4568
302.9	50.7344	50.2252
303.9	50.2877	49.9947
304.9	50.7162	49.7652
305.9	50.2786	49.5368
306.9	49.8117	49.3094
307.9	49.3549	49.083
308.9	48.4596	48.8577
309.9	48.8971	48.6334
310.9	48.4413	48.4102
311.9	48.4504	48.188
312.9	47.5369	47.9668
313.9	47.9762	47.7466
314.9	47.5186	47.5274
315.9	47.0718	47.3093
316.9	47.0627	47.0921
317.9	47.0627	46.8759
318.9	46.1674	46.6608
319.9	46.1674	46.4466
320.9	41.1626	41.5691
321.9	39.3098	39.4916
322.9	36.5699	37.4237
323.9	34.7564	35.3653
324.9	32.4723	33.3164
325.9	29.7334	31.2768
326.9	27.9081	29.2466
327.9	25.624	27.2258
328.9	23.7968	25.2142
329.9	21.5137	23.2118
330.9	20.1158	21.2187
331.9	17.4043	19.2347
332.9	15.5653	17.2597
333.9	13.2949	15.2939
334.9	11.0118	13.3371

## Sheet: T60C
Time_s	Measured_mV	Simulated_mV
0	0.014	0.328334
4.7	0.5	1.64409
6	0.5	2.00327
7	0.9	2.27818
8	0.9	2.55189
9	1.8	2.8244
10	1.8	3.09573
11	3.2	3.36587
12	1.8	3.63483
13	2.3	3.90262
14	2.8	4.16924
15	2.8	4.4347
16	2.8	4.699
17	3.7	4.96214
18	4.6	5.22414
19	4.6	5.48499
20	4.6	5.7447
21	4.6	6.00329
22	5.9	6.26074
23	6.4	6.51707
24	5.5	6.77228
25	5.5	7.02638
26	6.4	7.27936
27	5.9	7.53125
28	6.9	7.78203
29	7.3	8.03172
30	7.3	8.28033
31	6.9	8.52784
32	7.3	8.77428
33	8.2	9.01964
34	8.2	9.26393
35	8.2	9.50715
36	8.2	9.74931
37	9.6	9.99042
38	8.7	10.2305
39	8.7	10.4695
40	9.1	10.7074
41	10.1	10.9444
42	9.6	11.1803
43	10.1	11.4151
44	10.1	11.649
45	10.5	11.8818
46	11.9	12.1136
47	11	12.3444
48	11	12.5741
49	11.4	12.8029
50	11.4	13.0307
51	11.4	13.2575
52	12.3	13.4833
53	12.8	13.7081
54	12.8	13.9319
55	12.8	14.1548
56	13.7	14.3767
57	13.3	14.5976
58	14.6	14.8175
59	13.7	15.0365
60	14.2	15.2545
61	14.2	15.4716
62	14.2	15.6878
63	14.6	15.903
64	14.6	16.1172
65	15.1	16.3305
66	15.5	16.5429
67	15.5	16.7544
68	15.5	16.9649
69	16	17.1745
70	16	17.3832
71	16	17.591
72	16.9	17.7979
73	16.5	18.0039
74	17.4	18.209
75	16.9	18.4132
76	17.4	18.6165
77	17.8	18.8189
78	17.8	19.0204
79	18.3	19.221
80	17.8	19.4208
81	18.3	19.6197
82	18.7	19.8178
83	19.2	20.0149
84	19.2	20.2112
85	18.3	20.4067
86	19.2	20.6013
87	19.2	20.795
88	20.6	20.9879
89	20.6	21.18
90	21	21.3712
91	19.2	21.5616
92	21.5	21.7512
93	21	21.9399
94	21	22.1278
95	21	22.3149
96	21	22.5012
97	21	22.6866
98	21.9	22.8713
99	21.9	23.0551
100	21.5	23.2382
101	21.9	23.4204
102	22.4	23.6018
103	22.8	23.7825
104	23.3	23.9624
105	22.8	24.1415
106	23.8	24.3198
107	22.4	24.4973
108	23.3	24.674
109	23.3	24.85
110	24.2	25.0252
111	24.7	25.1997
112	24.7	25.3733
113	24.7	25.5463
114	24.7	25.7184
115	24.2	25.8898
116	24.2	26.0605
117	25.6	26.2304
118	25.6	26.3996
119	25.6	26.5681
120	25.1	26.7358
121	26	26.9028
122	26.5	27.069
123	26	27.2345
124	27	27.3993
125	27	27.5634
126	27.4	27.7268
127	27.4	27.8895
128	27.4	28.0514
129	27.4	28.2126
130	27.4	28.3732
131	27.9	28.533
132	27.9	28.6921
133	27.9	28.8506
134	28.3	29.0083
135	29.2	29.1654
136	28.8	29.3218
137	28.3	29.4775
138	29.7	29.6325
139	29.7	29.7868
140	29.2	29.9405
141	29.7	30.0935
142	30.2	30.2458
143	29.2	30.3975
144	30.2	30.5485
145	30.2	30.6988
146	30.2	30.8485
147	30.6	30.9975
148	30.6	31.1459
149	30.6	31.2936
150	31.1	31.4407
151	31.1	31.5872
152	31.5	31.733
153	31.5	31.8782
154	32.4	32.0227
155	31.5	32.1666
156	31.5	32.3099
157	32	32.4525
158	32.4	32.5946
159	32.4	32.736
160	32.4	32.8768
161	32.4	33.017
162	32.4	33.1565
163	32	33.2955
164	33.3	33.4338
165	33.3	33.5716
166	32.4	33.7087
167	34.3	33.8453
168	33.3	33.9813
169	33.3	34.1166
170	35.2	34.2514
171	34.3	34.3856
172	34.3	34.5192
173	34.3	34.6522
174	34.7	34.7846
175	35.6	34.9165
176	35.2	35.0477
177	34.3	35.1785
178	35.6	35.3086
179	35.2	35.4382
180	35.6	35.5672
181	35.2	35.6956
182	35.6	35.8235
183	36.5	35.9508
184	36.1	36.0776
185	35.2	36.2038
186	36.1	36.3294
187	36.1	36.4546
188	36.5	36.5791
189	37	36.7032
190	37	36.8266
191	36.5	36.9496
192	37	37.072
193	37	37.1939
194	37	37.3152
195	37.5	37.436
196	37.5	37.5563
197	36.5	37.6761
198	37.5	37.7953
199	37.5	37.914
200	37.5	38.0322
201	38.4	38.1499
202	37.9	38.2671
203	38.4	38.3837
204	37.9	38.4999
205	37.9	38.6155
206	37.9	38.7307
207	38.4	38.8453
208	39.3	38.9594
209	38.8	39.0731
210	38.4	39.1862
211	39.3	39.2989
212	38.8	39.411
213	38.8	39.5227
214	39.7	39.6339
215	39.3	39.7445
216	39.3	39.8548
217	39.7	39.9645
218	39.3	40.0737
219	39.7	40.1825
220	39.7	40.2908
221	39.7	40.3986
222	40.7	40.506
223	39.7	40.6129
224	40.2	40.7193
225	40.7	40.8253
226	40.7	40.9308
227	40.7	41.0358
228	41.1	41.1404
229	41.1	41.2445
230	41.1	41.3482
231	41.6	41.4514
232	41.1	41.5541
233	42	41.6564
234	41.1	41.7583
235	42	41.8597
236	42	41.9607
237	41.6	42.0613
238	42	42.1614
239	42	42.261
240	42	42.3603
241	42.5	42.4591
242	43.4	42.5574
243	42.9	42.6554
244	42.5	42.7529
245	42.9	42.8499
246	42.9	42.9466
247	43.8	43.0428
248	42.9	43.1387
249	42.5	43.2341
250	42.9	43.329
251	43.8	43.4236
252	43.8	43.5178
253	43.8	43.6115
254	43.8	43.7049
255	44.3	43.7978
256	43.8	43.8903
257	43.8	43.9824
258	44.3	44.0741
259	44.3	44.1655
260	44.8	44.2564
261	44.3	44.3469
262	45.2	44.437
263	44.3	44.5268
264	45.2	44.6161
265	45.2	44.7051
266	45.2	44.7936
267	45.2	44.8818
268	45.7	44.9696
269	44.3	45.057
270	46.1	45.144
271	45.7	45.2307
272	45.7	45.3169
273	45.7	45.4028
274	46.1	45.4884
275	46.1	45.5735
276	47	45.6583
277	46.1	45.7427
278	47	45.8267
279	47	45.9104
280	47	45.9937
281	46.1	46.0766
282	47	46.1592
283	46.6	46.2414
284	47	46.3233
285	46.6	46.4048
286	47.5	46.4859
287	47.5	46.5667
288	47.5	46.6472
289	48	46.7273
290	48	46.807
291	48.4	46.8864
292	47.5	46.9654
293	48.4	47.0441
294	48.9	47.1225
295	48.4	47.2005
296	48.4	47.2782
297	48.9	47.3555
298	49.8	47.4325
299	48.4	47.5092
300	49.3	47.2572
301	47.9582	47.0509
302	47.9674	46.8456
303	47.5114	46.6412
304	47.9582	46.4377
305	46.5979	46.235
306	47.484	46.0333
307	46.1502	45.8324
308	45.6924	45.6324
309	46.1319	45.4332
310	45.2274	45.235
311	45.2274	45.0376
312	45.6559	44.841
313	44.3138	44.6454
314	43.8671	44.4505
315	43.8671	44.2566
316	43.8488	44.0634
317	44.735	43.8711
318	42.4976	43.6797
319	42.9444	43.4891
320	43.3837	41.3293
321	38.8395	39.447
322	36.1005	37.573
323	35.1595	35.7071
324	31.9892	33.8494
325	29.2777	31.9998
326	27.8525	30.1582
327	25.5694	28.3247
328	23.3	26.4992
329	21.0041	24.6817
330	18.7347	22.8721
331	16.9075	21.0704
332	15.0812	19.2765
333	12.8118	17.4905
334	10.5278	15.7123
335	9.1446	13.9418

## Sheet: T80C
Time_s	Measured_mV	Simulated_mV
0	0.005	0.328165
1.1	0.9	0.617529
2.1	1.3	0.879348
3.1	0.9	1.13999
4.1	2.2	1.39947
5.1	2.7	1.65778
6.1	2.7	1.91494
7.1	1.8	2.17094
8.1	2.7	2.42579
9.1	3.2	2.6795
10.1	3.2	2.93207
11.1	4.5	3.18351
12.1	4.5	3.43382
13.1	4.5	3.68301
14.1	3.6	3.93108
15.1	4.5	4.17804
16.1	4.1	4.42389
17.1	5.4	4.66864
18.1	5.9	4.91229
19.1	5	5.15485
20.1	6.4	5.39632
21.1	6.4	5.63671
22.1	6.4	5.87602
23.1	6.8	6.11426
24.1	6.4	6.35143
25.1	6.8	6.58753
26.1	7.3	6.82258
27.1	7.3	7.05657
28.1	7.7	7.28952
29.1	8.2	7.52141
30.1	7.7	7.75227
31.1	7.7	7.98209
32.1	8.6	8.21089
33.1	9.1	8.43865
34.1	9.1	8.6654
35.1	10	8.89113
36.1	9.5	9.11584
37.1	9.5	9.33955
38.1	10.5	9.56225
39.1	9.5	9.78396
40.1	10.5	10.0047
41.1	11.4	10.2244
42.1	10.9	10.4431
43.1	10.9	10.6609
44.1	11.4	10.8777
45.1	11.8	11.0935
46.1	11.4	11.3083
47.1	11.4	11.5222
48.1	11.8	11.7351
49.1	11.8	11.9471
50.1	12.3	12.1581
51.1	12.3	12.3681
52.1	12.7	12.5773
53.1	11.8	12.7854
54.1	13.2	12.9927
55.1	12.7	13.199
56.1	12.7	13.4044
57.1	13.7	13.6089
58.1	14.1	13.8125
59.1	13.7	14.0151
60.1	13.7	14.2168
61.1	14.1	14.4177
62.1	14.1	14.6176
63.1	14.1	14.8166
64.1	14.6	15.0148
65.1	14.6	15.212
66.1	15	15.4084
67.1	15.5	15.6039
68.1	15.5	15.7985
69.1	15.9	15.9922
70.1	15.9	16.1851
71.1	16.4	16.3771
72.1	15.9	16.5683
73.1	16.9	16.7585
74.1	15.9	16.948
75.1	17.8	17.1366
76.1	16.9	17.3243
77.1	17.8	17.5112
78.1	17.3	17.6973
79.1	17.8	17.8825
80.1	17.8	18.0669
81.1	17.8	18.2504
82.1	17.8	18.4332
83.1	17.8	18.6151
84.1	18.7	18.7962
85.1	18.7	18.9765
86.1	19.6	19.156
87.1	19.1	19.3347
88.1	18.7	19.5126
89.1	18.2	19.6896
90.1	19.6	19.8659
91.1	19.1	20.0414
92.1	19.1	20.2161
93.1	20.5	20.3901
94.1	19.6	20.5632
95.1	20.5	20.7356
96.1	20.1	20.9072
97.1	20.5	21.078
98.1	21	21.2481
99.1	20.5	21.4174
100.1	20.55	21.5859
101.1	21.36	21.7537
102.1	21.85	21.9207
103.1	20.59	22.087
104.1	21.4	22.2526
105.1	22.26	22.4174
106.1	21.09	22.5814
107.1	22.3	22.7447
108.1	22.3	22.9073
109.1	22.75	23.0692
110.1	22.08	23.2303
111.1	22.35	23.3907
112.1	23.16	23.5504
113.1	23.2	23.7094
114.1	23.2	23.8677
115.1	23.34	24.0252
116.1	23.7	24.1821
117.1	23.7	24.3382
118.1	23.65	24.4936
119.1	23.75	24.6484
120.1	24.2	24.8024
121.1	23.75	24.9558
122.1	24.6	25.1085
123.1	24.6	25.2605
124.1	24.6	25.4118
125.1	24.65	25.5624
126.1	25.1	25.7124
127.1	25.55	25.8616
128.1	24.65	26.0102
129.1	25.5	26.1582
130.1	25.5	26.3055
131.1	26.36	26.4521
132.1	26.36	26.5981
133.1	26.85	26.7434
134.1	25.95	26.888
135.1	27.3	27.032
136.1	26.9	27.1754
137.1	26.95	27.3181
138.1	26.04	27.4602
139.1	27.35	27.6016
140.1	26.45	27.7424
141.1	27.04	27.8826
142.1	26.99	28.0222
143.1	26.95	28.1611
144.1	27.44	28.2994
145.1	27.49	28.4371
146.1	27.44	28.5741
147.1	27.8	28.7106
148.1	27.49	28.8464
149.1	28.3	28.9816
150.1	28.7	29.1162
151.1	28.34	29.2503
152.1	28.75	29.3837
153.1	28.75	29.5165
154.1	28.84	29.6487
155.1	29.24	29.7803
156.1	30.01	29.9114
157.1	29.6	30.0418
158.1	29.24	30.1717
159.1	29.24	30.301
160.1	29.2	30.4297
161.1	30.15	30.5578
162.1	30.1	30.6853
163.1	30.15	30.8123
164.1	30.1	30.9387
165.1	30.15	31.0646
166.1	30.64	31.1899
167.1	30.6	31.3146
168.1	30.64	31.4387
169.1	31.05	31.5623
170.1	31	31.6854
171.1	31.05	31.8079
172.1	31.81	31.9298
173.1	31	32.0512
174.1	30.64	32.1721
175.1	31.5	32.2924
176.1	31.54	32.4121
177.1	31.54	32.5314
178.1	32.35	32.6501
179.1	31.09	32.7682
180.1	32.35	32.8859
181.1	31.9	33.003
182.1	32.76	33.1196
183.1	32.4	33.2356
184.1	32.85	33.3512
185.1	32.76	33.4662
186.1	33.16	33.5807
187.1	32.8	33.6947
188.1	32.8	33.8082
189.1	32.49	33.9212
190.1	33.3	34.0336
191.1	34.16	34.1456
192.1	33.8	34.2571
193.1	34.2	34.368
194.1	33.39	34.4785
195.1	33.35	34.5884
196.1	34.2	34.6979
197.1	34.25	34.8069
198.1	33.98	34.9154
199.1	34.11	35.0234
200.1	34.65	35.1309
201.1	35.01	35.238
202.1	34.2	35.3445
203.1	34.25	35.4506
204.1	34.83	35.5562
205.1	35.87	35.6614
206.1	34.7	35.766
207.1	34.83	35.8702
208.1	35.1	35.9739
209.1	35.96	36.0772
210.1	35.15	36.18
211.1	35.96	36.2823
212.1	35.6	36.3842
213.1	35.96	36.4856
214.1	35.73	36.5866
215.1	36.54	36.6871
216.1	36.45	36.7872
217.1	36.45	36.8868
218.1	36.9	36.986
219.1	36.54	37.0847
220.1	36.5	37.183
221.1	36.9	37.2808
222.1	36.45	37.3782
223.1	36.95	37.4752
224.1	36.95	37.5717
225.1	37.35	37.6678
226.1	37.85	37.7635
227.1	38.26	37.8587
228.1	37.94	37.9535
229.1	38.3	38.0479
230.1	37.9	38.1419
231.1	37.45	38.2354
232.1	38.35	38.3285
233.1	38.3	38.4212
234.1	38.35	38.5135
235.1	38.35	38.6054
236.1	38.3	38.6968
237.1	38.3	38.7879
238.1	38.35	38.8785
239.1	39.16	38.9688
240.1	39.16	39.0586
241.1	38.89	39.148
242.1	40.15	39.2371
243.1	39.65	39.3257
244.1	38.93	39.4139
245.1	40.06	39.5017
246.1	38.89	39.5892
247.1	40.01	39.6762
248.1	39.7	39.7629
249.1	40.51	39.8492
250.1	40.55	39.935
251.1	40.1	40.0205
252.1	40.6	40.1057
253.1	40.1	40.1904
254.1	40.6	40.2747
255.1	40.6	40.3587
256.1	40.15	40.4423
257.1	40.1	40.5255
258.1	41.1	40.6084
259.1	40.65	40.6909
260.1	40.6	40.773
261.1	40.65	40.8547
262.1	40.69	40.9361
263.1	41.1	41.0171
264.1	41.5	41.0977
265.1	41.5	41.178
266.1	41.14	41.2579
267.1	41.14	41.3375
268.1	41.5	41.4167
269.1	41.5	41.4956
270.1	42	41.5741
271.1	41.95	41.6522
272.1	41.95	41.73
273.1	42	41.8075
274.1	41.95	41.8846
275.1	42	41.9613
276.1	42.31	42.0377
277.1	41.28	42.1138
278.1	42.13	42.1895
279.1	42.94	42.2649
280.1	42.4	42.34
281.1	42.81	42.4147
282.1	42.4	42.4891
283.1	42.09	42.5631
284.1	43.26	42.6368
285.1	42.9	42.7102
286.1	42.45	42.7832
287.1	42.85	42.856
288.1	43.21	42.9284
289.1	43.3	43.0004
290.1	44.2	43.0722
291.1	43.8	43.1436
292.1	43.8	43.2147
293.1	43.8	43.2855
294.1	44.25	43.356
295.1	44.25	43.4262
296.1	44.3	43.496
297.1	44.3	43.5655
298.1	43.75	43.6347
299.1	44.7	43.7036
300.1	43.4	43.4177
301.1	42.54	43.223
302.1	43.26	43.0292
303.1	43.26	42.8362
304.1	42	42.6441
305.1	42.45	42.4529
306.1	40.69	42.2625
307.1	41.95	42.0729
308.1	41.46	41.8843
309.1	41.05	41.6964
310.1	41.05	41.5094
311.1	40.6	41.3233
312.1	40.55	41.138
313.1	40.55	40.9535
314.1	39.74	40.7698
315.1	39.25	40.587
316.1	40.55	40.405
317.1	38.8	40.2238
318.1	38.84	40.0434
319.1	38.75	39.8638
320.1	35.96	37.5579
321.1	31.95	35.8019
322.1	29.56	34.0538
323.1	26.45	32.3136
324.1	24.51	30.5811
325.1	21.31	28.8565
326.1	18.25	27.1395
327.1	15.81	25.4303
328.1	13.2	23.7287
329.1	11.31	22.0348
330.1	8.96	20.3484
331.1	5.9	18.6696
332.1	4.37	16.9984
333.1	1.3	15.3346

## Sheet: T100C
Time_s	Measured_mV	Simulated_mV
0	0.009	0.298374
5.6	1.24345e-14	1.73686
6.7	0	2.01494
7.7	1	2.26649
8.7	1	2.51683
9.7	1	2.76599
10.7	1.4	3.01397
11.7	1.4	3.26077
12.7	2.3	3.5064
13.7	2.8	3.75086
14.7	3.2	3.99416
15.7	2.8	4.23631
16.7	3.2	4.47731
17.7	3.2	4.71716
18.7	3.7	4.95587
19.7	3.7	5.19345
20.7	4.2	5.42991
21.7	5.1	5.66524
22.7	4.2	5.89945
23.7	5.5	6.13255
24.7	4.6	6.36455
25.7	5.5	6.59544
26.7	6	6.82524
27.7	6	7.05394
28.7	6.4	7.28156
29.7	6	7.5081
30.7	6.9	7.73357
31.7	7.3	7.95796
32.7	7.8	8.18129
33.7	7.3	8.40356
34.7	7.3	8.62477
35.7	8.7	8.84494
36.7	7.8	9.06405
37.7	8.3	9.28213
38.7	8.3	9.49917
39.7	9.2	9.71518
40.7	9.2	9.93017
41.7	9.2	10.1441
42.7	9.6	10.3571
43.7	9.2	10.569
44.7	9.2	10.78
45.7	10.1	10.9899
46.7	9.6	11.1988
47.7	10.5	11.4068
48.7	9.6	11.6137
49.7	10.1	11.8197
50.7	11	12.0247
51.7	10.5	12.2287
52.7	11	12.4318
53.7	11.9	12.6339
54.7	11	12.835
55.7	11	13.0352
56.7	12.4	13.2344
57.7	11.5	13.4327
58.7	12.8	13.63
59.7	12.4	13.8264
60.7	12.8	14.0219
61.7	12.8	14.2164
62.7	13.3	14.41
63.7	12.8	14.6027
64.7	13.3	14.7945
65.7	13.3	14.9854
66.7	13.7	15.1754
67.7	14.7	15.3644
68.7	14.2	15.5526
69.7	14.2	15.7399
70.7	14.7	15.9262
71.7	14.7	16.1117
72.7	14.7	16.2964
73.7	15.1	16.4801
74.7	16.5	16.663
75.7	15.1	16.845
76.7	16	17.0261
77.7	15.1	17.2064
78.7	16.5	17.3858
79.7	16.5	17.5644
80.7	16	17.7421
81.7	16.5	17.919
82.7	16.9	18.095
83.7	17.9	18.2702
84.7	17.4	18.4446
85.7	16.9	18.6181
86.7	16.9	18.7909
87.7	18.8	18.9628
88.7	17.9	19.1339
89.7	18.3	19.3041
90.7	18.3	19.4736
91.7	18.3	19.6422
92.7	18.8	19.8101
93.7	18.8	19.9772
94.7	18.3	20.1434
95.7	19.7	20.3089
96.7	19.2	20.4736
97.7	19.7	20.6375
98.7	19.7	20.8007
99.7	19.7	20.963
100.7	20.1	21.1246
101.7	19.2	21.2854
102.7	20.1	21.4455
103.7	20.45	21.6048
104.7	20.72	21.7633
105.7	20.1	21.9211
106.7	20.45	22.0781
107.7	21.23	22.2344
108.7	21.5	22.39
109.7	21.23	22.5448
110.7	20.88	22.6989
111.7	21.85	22.8522
112.7	21.65	23.0049
113.7	21.5	23.1567
114.7	22	23.3079
115.7	21.85	23.4584
116.7	22	23.6081
117.7	22.75	23.7571
118.7	22.4	23.9055
119.7	22.55	24.0531
120.7	22.75	24.2
121.7	23.18	24.3462
122.7	23.93	24.4918
123.7	23.65	24.6366
124.7	23.18	24.7807
125.7	23.29	24.9242
126.7	23.8	25.067
127.7	23.92	25.2091
128.7	23.8	25.3505
129.7	24.7	25.4913
130.7	24.7	25.6314
131.7	24.85	25.7708
132.7	24.55	25.9096
133.7	25.2	26.0477
134.7	24.85	26.1851
135.7	25.48	26.3219
136.7	24.9	26.4581
137.7	24.9	26.5936
138.7	25.48	26.7284
139.7	25.32	26.8626
140.7	25.83	26.9962
141.7	25.68	27.1292
142.7	26.1	27.2615
143.7	26.5	27.3932
144.7	25.87	27.5242
145.7	26.5	27.6547
146.7	26.38	27.7845
147.7	26.65	27.9137
148.7	26.85	28.0423
149.7	27.75	28.1703
150.7	27.75	28.2976
151.7	27.9	28.4244
152.7	27.12	28.5506
153.7	27.4	28.6761
154.7	27.9	28.8011
155.7	27.55	28.9255
156.7	27.9	29.0493
157.7	28.52	29.1725
158.7	27.9	29.2951
159.7	28.8	29.4171
160.7	28.52	29.5386
161.7	28.52	29.6594
162.7	29.58	29.7797
163.7	28.95	29.8995
164.7	29.15	30.0186
165.7	29.58	30.1372
166.7	29.43	30.2553
167.7	29.85	30.3727
168.7	28.95	30.4897
169.7	29.7	30.606
170.7	30.2	30.7218
171.7	29.7	30.8371
172.7	30.32	30.9518
173.7	29.85	31.066
174.7	30.2	31.1796
175.7	30.12	31.2927
176.7	30.47	31.4052
177.7	30.32	31.5172
178.7	30.6	31.6287
179.7	30.95	31.7397
180.7	30.95	31.8501
181.7	30.6	31.96
182.7	31.25	32.0694
183.7	31.45	32.1782
184.7	31.6	32.2866
185.7	31.87	32.3944
186.7	31.88	32.5017
187.7	31.87	32.6085
188.7	31.88	32.7148
189.7	32.35	32.8206
190.7	32.15	32.9259
191.7	31.52	33.0307
192.7	32.5	33.135
193.7	31.87	33.2388
194.7	32.62	33.3421
195.7	32	33.445
196.7	33.8	33.5473
197.7	33.4	33.6491
198.7	32.78	33.7505
199.7	33.68	33.8514
200.7	32.62	33.9518
201.7	33.8	34.0517
202.7	33.4	34.1512
203.7	34.43	34.2501
204.7	33.68	34.3486
205.7	33.79	34.4467
206.7	34.15	34.5443
207.7	34.15	34.6414
208.7	33.95	34.738
209.7	34.7	34.8342
210.7	34.3	34.93
211.7	34.7	35.0252
212.7	34.15	35.1201
213.7	34.85	35.2144
214.7	34.57	35.3084
215.7	34.57	35.4019
216.7	35.55	35.4949
217.7	35.35	35.5875
218.7	35.05	35.6797
219.7	35.2	35.7714
220.7	35.7	35.8627
221.7	35.82	35.9535
222.7	35.82	36.0439
223.7	35.7	36.1339
224.7	36.1	36.2235
225.7	36.1	36.3126
226.7	35.55	36.4014
227.7	36.1	36.4896
228.7	35.82	36.5775
229.7	36.6	36.665
230.7	36.6	36.752
231.7	36.73	36.8387
232.7	36.88	36.9249
233.7	37.08	37.0107
234.7	36.88	37.0961
235.7	36.6	37.1811
236.7	36.72	37.2657
237.7	37.5	37.3499
238.7	36.72	37.4337
239.7	36.72	37.5171
240.7	37.62	37.6001
241.7	37.78	37.6827
242.7	37.63	37.7649
243.7	37.78	37.8467
244.7	37.62	37.9281
245.7	38.13	38.0092
246.7	38.05	38.0898
247.7	38.25	38.1701
248.7	38.75	38.25
249.7	38.4	38.3295
250.7	38.4	38.4087
251.7	38.05	38.4875
252.7	38.75	38.5658
253.7	38.67	38.6439
254.7	38.75	38.7215
255.7	38.9	38.7988
256.7	39.18	38.8757
257.7	39.18	38.9523
258.7	39.8	39.0284
259.7	39.65	39.1043
260.7	39.3	39.1797
261.7	39.8	39.2548
262.7	39.17	39.3296
263.7	39.8	39.404
264.7	40.2	39.478
265.7	40.2	39.5517
266.7	39.57	39.625
267.7	40.2	39.698
268.7	40.2	39.7707
269.7	40.55	39.843
270.7	40.98	39.9149
271.7	40.2	39.9866
272.7	39.92	40.0578
273.7	40.35	40.1288
274.7	40.55	40.1994
275.7	40.35	40.2696
276.7	41.1	40.3396
277.7	40.98	40.4092
278.7	41.1	40.4784
279.7	41.33	40.5474
280.7	41.6	40.616
281.7	41.1	40.6843
282.7	41.1	40.7522
283.7	41.25	40.8199
284.7	41.45	40.8872
285.7	41.25	40.9542
286.7	41.75	41.0209
287.7	42.1	41.0872
288.7	41.6	41.1533
289.7	42.38	41.219
290.7	42.22	41.2845
291.7	42.1	41.3496
292.7	42.22	41.4144
293.7	42.38	41.4789
294.7	41.87	41.5431
295.7	41.45	41.6069
296.7	42.73	41.6705
297.7	42.85	41.7338
298.7	42.65	41.7968
299.7	43	41.8595
300.7	42.37	41.4416
301.7	41.95	41.2448
302.7	41.1	41.049
303.7	41.1	40.8541
304.7	41.25	40.6602
305.7	41.1	40.4672
306.7	39.72	40.275
307.7	39.72	40.0838
308.7	39.53	39.8935
309.7	39.3	39.7042
310.7	39.02	39.5157
311.7	38.9	39.3281
312.7	39.17	39.1414
313.7	38.4	38.9555
314.7	38.55	38.7706
315.7	37.9	38.5865
316.7	37.5	38.4033
317.7	37.9	38.221
318.7	37.15	38.0396
319.7	36.87	37.859
320.7	33.8	34.7975
321.7	30.62	33.0657
322.7	27.28	31.3421
323.7	24.85	29.6266
324.7	21.15	27.9193
325.7	19.2	26.2201
326.7	16.62	24.529
327.7	12.95	22.8459
328.7	10.22	21.1708
329.7	8.42	19.5036
330.7	5.92	17.8444
331.7	3.35	16.193
332.7	1.12	14.5495

## Sheet: T120C
Time_s	Measured_mV	Simulated_mV
0	0	0.395605
1.2	0.91	0.695304
2.2	0	0.943125
3.2	1.83	1.18921
4.2	1.37	1.43356
5.2	1.83	1.6762
6.2	1.83	1.91713
7.2	1.83	2.15638
8.2	2.74	2.39394
9.2	1.83	2.62984
10.2	2.74	2.86408
11.2	3.65	3.09668
12.2	2.74	3.32764
13.2	3.65	3.55699
14.2	3.65	3.78472
15.2	3.65	4.01085
16.2	4.57	4.2354
17.2	4.57	4.45837
18.2	5.02	4.67978
19.2	5.48	4.89963
20.2	5.48	5.11794
21.2	5.48	5.33471
22.2	5.94	5.54997
23.2	6.39	5.76371
24.2	5.94	5.97596
25.2	6.85	6.18671
26.2	6.85	6.39598
27.2	7.26	6.60379
28.2	7.26	6.81013
29.2	7.76	7.01503
30.2	7.26	7.21849
31.2	7.26	7.42052
32.2	7.26	7.62114
33.2	7.76	7.82034
34.2	8.66	8.01815
35.2	8.66	8.21457
36.2	8.26	8.40961
37.2	8.66	8.60328
38.2	9.16	8.79559
39.2	9.16	8.98655
40.2	8.66	9.17617
41.2	10.1	9.36446
42.2	9.56	9.55143
43.2	10.1	9.73708
44.2	10.5	9.92143
45.2	10.1	10.1045
46.2	10.5	10.2863
47.2	11	10.4668
48.2	10.1	10.646
49.2	11.5	10.824
50.2	11.5	11.0007
51.2	11.9	11.1762
52.2	11	11.3504
53.2	11.9	11.5234
54.2	11.9	11.6953
55.2	11.5	11.8659
56.2	12.4	12.0353
57.2	12.4	12.2035
58.2	12.4	12.3705
59.2	12.8	12.5364
60.2	13.7	12.7011
61.2	12.8	12.8647
62.2	12.8	13.027
63.2	12.8	13.1883
64.2	13.3	13.3484
65.2	13.3	13.5074
66.2	13.7	13.6653
67.2	13.7	13.8221
68.2	14.2	13.9778
69.2	13.3	14.1324
70.2	14.2	14.2859
71.2	14.2	14.4383
72.2	14.7	14.5896
73.2	14.7	14.7399
74.2	15.1	14.8892
75.2	14.2	15.0373
76.2	15.6	15.1845
77.2	14.7	15.3306
78.2	15.1	15.4757
79.2	16	15.6198
80.2	15.6	15.7628
81.2	15.1	15.9049
82.2	16	16.0459
83.2	16.5	16.186
84.2	16.5	16.3251
85.2	16.5	16.4632
86.2	15.6	16.6003
87.2	16.5	16.7365
88.2	17.4	16.8717
89.2	16.5	17.006
90.2	16.9	17.1393
91.2	17.4	17.2717
92.2	16.9	17.4032
93.2	16.5	17.5337
94.2	17.4	17.6633
95.2	17.8	17.7921
96.2	17.8	17.9199
97.2	17.4	18.0468
98.2	17.4	18.1728
99.2	17.4	18.2979
100.2	17.9	18.4222
101.2	18.4	18.5456
102.2	18.2	18.6681
103.2	18.7	18.7898
104.2	18.4	18.9106
105.2	18.88	19.0305
106.2	18.8	19.1497
107.2	18.8	19.2679
108.2	18.8	19.3854
109.2	18.4	19.502
110.2	19.2	19.6178
111.2	18.8	19.7328
112.2	19.2	19.847
113.2	19.3	19.9604
114.2	19.7	20.073
115.2	19.3	20.1848
116.2	20.02	20.2958
117.2	20.02	20.406
118.2	19.7	20.5155
119.2	19.78	20.6242
120.2	20.2	20.7321
121.2	20.5	20.8393
122.2	20.6	20.9457
123.2	20.1	21.0514
124.2	20.6	21.1563
125.2	20.82	21.2605
126.2	20.74	21.364
127.2	20.6	21.4667
128.2	20.92	21.5687
129.2	20.68	21.67
130.2	20.68	21.7706
131.2	20.78	21.8705
132.2	21	21.9697
133.2	21.32	22.0682
134.2	21	22.166
135.2	21.22	22.2631
136.2	21.2	22.3595
137.2	21.32	22.4552
138.2	21.1	22.5503
139.2	21.5	22.6447
140.2	20.78	22.7385
141.2	21.9	22.8316
142.2	22.22	22.924
143.2	21.5	23.0158
144.2	21.2	23.1069
145.2	22.32	23.1974
146.2	22.18	23.2873
147.2	22.22	23.3765
148.2	22.9	23.4651
149.2	23.22	23.5531
150.2	23.12	23.6405
151.2	22.8	23.7273
152.2	22.58	23.8134
153.2	22.9	23.899
154.2	22.98	23.9839
155.2	23.12	24.0682
156.2	23.12	24.152
157.2	23.22	24.2352
158.2	23.08	24.3177
159.2	23.7	24.3998
160.2	23.4	24.4812
161.2	23.04	24.562
162.2	23.7	24.6423
163.2	23.22	24.722
164.2	23.88	24.8012
165.2	23.8	24.8798
166.2	24.7	24.9579
167.2	23.8	25.0354
168.2	23.88	25.1124
169.2	24.3	25.1888
170.2	24.12	25.2647
171.2	25.1	25.34
172.2	23.98	25.4149
173.2	24.92	25.4892
174.2	24.3	25.5629
175.2	24.4	25.6362
176.2	24.8	25.709
177.2	23.98	25.7812
178.2	24.88	25.8529
179.2	25.42	25.9241
180.2	25.1	25.9949
181.2	25.2	26.0651
182.2	25.1	26.1348
183.2	25.28	26.2041
184.2	25.2	26.2729
185.2	24.88	26.3411
186.2	25.52	26.4089
187.2	25.52	26.4763
188.2	26	26.5431
189.2	26.1	26.6095
190.2	25.6	26.6754
191.2	25.78	26.7409
192.2	26.18	26.8059
193.2	26.42	26.8704
194.2	26.42	26.9345
195.2	26	26.9981
196.2	26.68	27.0613
197.2	25.88	27.124
198.2	26.1	27.1864
199.2	26.42	27.2482
200.2	27	27.3097
201.2	27	27.3707
202.2	26.9	27.4312
203.2	26.82	27.4914
204.2	27	27.5511
205.2	26.9	27.6104
206.2	26.36	27.6693
207.2	27.32	27.7278
208.2	26.78	27.7858
209.2	27.32	27.8435
210.2	27.5	27.9008
211.2	28.4	27.9576
212.2	26.68	28.0141
213.2	27.5	28.0701
214.2	27.32	28.1258
215.2	27.08	28.1811
216.2	28.3	28.2359
217.2	27.8	28.2904
218.2	27.8	28.3446
219.2	27.6	28.3983
220.2	27.6	28.4517
221.2	28.72	28.5046
222.2	27.9	28.5573
223.2	27.9	28.6095
224.2	28.3	28.6614
225.2	27.6	28.7129
226.2	28.18	28.764
227.2	28	28.8148
228.2	27.6	28.8653
229.2	28.4	28.9154
230.2	28.72	28.9651
231.2	28.4	29.0145
232.2	28.62	29.0635
233.2	28.8	29.1122
234.2	28.8	29.1605
235.2	28.9	29.2086
236.2	29.3	29.2562
237.2	29.2	29.3036
238.2	28.8	29.3506
239.2	28.8	29.3972
240.2	28.9	29.4436
241.2	29.2	29.4896
242.2	29.2	29.5353
243.2	28.48	29.5807
244.2	28.58	29.6258
245.2	29.62	29.6705
246.2	29.3	29.7149
247.2	29.7	29.759
248.2	29.2	29.8029
249.2	28.98	29.8464
250.2	29.7	29.8895
251.2	29.48	29.9324
252.2	29.7	29.975
253.2	30.2	30.0173
254.2	29.8	30.0593
255.2	29.62	30.101
256.2	30.2	30.1424
257.2	30.1	30.1835
258.2	29.16	30.2244
259.2	29.7	30.2649
260.2	30.7	30.3052
261.2	30.2	30.3451
262.2	30.38	30.3848
263.2	30.52	30.4243
264.2	30.6	30.4634
265.2	30.78	30.5023
266.2	31.1	30.5409
267.2	30.92	30.5792
268.2	31.1	30.6172
269.2	30.92	30.655
270.2	31	30.6925
271.2	31.1	30.7298
272.2	30.38	30.7668
273.2	31.42	30.8035
274.2	31.18	30.84
275.2	31	30.8762
276.2	31.42	30.9122
277.2	31.18	30.9479
278.2	32	30.9834
279.2	32	31.0186
280.2	31.6	31.0535
281.2	31.5	31.0883
282.2	31.6	31.1227
283.2	32	31.157
284.2	31.7	31.191
285.2	32.1	31.2247
286.2	31.9	31.2582
287.2	32.1	31.2915
288.2	31.28	31.3246
289.2	32.4	31.3574
290.2	31.6	31.39
291.2	32.4	31.4223
292.2	32.1	31.4545
293.2	32.72	31.4864
294.2	32.58	31.5181
295.2	32.4	31.5495
296.2	32.72	31.5808
297.2	32.58	31.6118
298.2	32.72	31.6426
299.2	31.6	31.6732
300.2	31.6	31.2578
301.2	31.6	31.0384
302.2	31.5	30.8205
303.2	31	30.6042
304.2	30.7	30.3894
305.2	29.7	30.176
306.2	29.62	29.9642
307.2	29.48	29.7539
308.2	28.8	29.545
309.2	29.2	29.3376
310.2	28.08	29.1317
311.2	28.4	28.9272
312.2	27.72	28.7242
313.2	26.68	28.5225
314.2	27.08	28.3223
315.2	26.6	28.1235
316.2	27	27.9261
317.2	26.1	27.7301
318.2	26.1	27.5354
319.2	25.7	27.3421
320.2	22.08	24.4758
321.2	20.5	22.7878
322.2	17.4	21.1116
323.2	14.6	19.4472
324.2	11	17.7945
325.2	8.38	16.1534
326.2	5.572	14.5238
327.2	2.372	12.9056
328.2	0.276	11.2988
