# Supplementary material for: Empirical Model of a High-Temperature Proton Exchange Membrane Fuel Cell for Diagnostics Based on Test Without Active Gases Procedure
Source: Research Square preprint supplement (doi:10.21203/rs.3.rs-7308557/v1), 2025-08-22
Supplement: Supplementary file 2 [file 4984d02936f508f0f830152e.xlsx]

## Sheet: Sheet1
Temperature [°C]	RMSE
40	0.00112
60	0.00112
80	0.00194
100	0.00208
120	0.00131
