# Supplementary material for: Empirical Model of a High-Temperature Proton Exchange Membrane Fuel Cell for Diagnostics Based on Test Without Active Gases Procedure
Source: Research Square preprint supplement (doi:10.21203/rs.3.rs-7308557/v1), 2025-08-22
Supplement: Supplementary file 3 [file 67ba23b18b3b4e9c36d75872.xlsx]

## Sheet: Sheet1
Temperature [°C]	R0 [Ω]	R1 [Ω]	C1 [F]
40	68.5	0.5	3.15
60	65	0.33	3.5
80	59	0.33	3.75
100	55	0.3	3.8
120	36	0.4	3.9
